# Supplementary material for: Epidemiology, baseline characteristics and risk of progression in the first South-Asian prospective longitudinal observational IgA nephropathy cohort
Source: PubMed Central journal article supplement — Kidney Int Rep. 2020 Dec 7;6(2):414–28. doi: 10.1016/j.ekir.2020.11.026 (PMC7879115; doi:10.1016/j.ekir.2020.11.026), 2020-12-07
Supplement: mmc1.pdf [file mmc1.pdf]

**Table S1 Inclusion and Exclusion Criteria for the GRACE-IgANI cohort**

| <b>Inclusion criteria</b>                                     | <b>Exclusion criteria</b>                                                                                                                                          |
|---------------------------------------------------------------|--------------------------------------------------------------------------------------------------------------------------------------------------------------------|
| Age $\geq$ 18 years                                           | Secondary IgA nephropathy: e.g. due to lupus, liver cirrhosis, Henoch-Schonlein purpura.                                                                           |
| Primary IgAN diagnosed by renal biopsy                        | Glomerular filtration rate as estimated by the CKD-EPI equation $<10$ ml/min/1.73 m <sup>2</sup> .                                                                 |
| Immunosuppression naive for three months prior to recruitment | Patients with systemic diseases that can affect the kidneys like diabetes, systemic lupus erythematosus, presence of HIV, HBsAg, HCV infections, malignancies etc. |
| Willing to come for follow-up visits                          | Patients with a history of psychological illness or condition which interferes with their ability to understand or comply with the requirements of the study.      |

Abbreviations: HBsAg, hepatitis B surface antigen; HCV, hepatitis C virus.

**Table S2 Impact of gender on demographic and baseline clinical characteristics of the GRACE-IgANI cohort**

| Baseline characteristic                                                             | Entire Cohort<br>(n=201) | Male<br>(n=142)    | Female<br>(n=59)    | P value      |
|-------------------------------------------------------------------------------------|--------------------------|--------------------|---------------------|--------------|
| Age (years, mean±SD)                                                                | 36±10.02                 | 36.85±10.42        | 33.97±8.75          | 0.06         |
| BMI (kg/m <sup>2</sup> , mean±SD)                                                   | 24.7±4.05                | 24.52±4.0          | 25.44±4.1           | 0.15         |
| Hypertension (Yes/Evaluable patients (%))                                           | 169/201 (84.1)           | 124/143 (86.7)     | 45/58 (77.6)        | 0.08         |
| Time to renal biopsy from onset of hypertension (months, median (IQR) (n))          | 10 (2 to 36) (167)       | 9 (2 to 36) (122)  | 12 (5 to 28) (45)   | 0.93         |
| Systolic blood pressure (Hg) (mean±SD)                                              | 138±20.33                | 140.56±19.1        | 133.49±22.4         | <b>0.024</b> |
| Diastolic blood pressure (mmHg) (mean±SD)                                           | 86.69±12.56              | 87.67±12.4         | 84.32±12.           | 0.09         |
| Mean arterial pressure (mmHg) (mean±SD)                                             | 103.95±14.34             | 105.3±14           | 100.71±14.8         | <b>0.011</b> |
| Blood pressure ≥ 140/90mmHg (Yes/Evaluable patients (%))                            | 110/201 (55)             | 85/143 (59)        | 25/59 (42)          | <b>0.020</b> |
| Sympharyngitic illness prior to presentation (Yes/Evaluable patients (%))           | 8/200 (4)                | 4/142 (2.8)        | 4/58 (6.9)          | 0.18         |
| Pedal edema prior to presentation ((Yes/Evaluable patients (%))                     | 93/200 (46.5)            | 58/142 (40.8)      | 35/58 (60.3)        | <b>0.012</b> |
| Time to renal biopsy from onset of pedal edema (months, median (IQR) (n))           | 4 (2 to 11.5) (93)       | 3 (1 to 8.5) (57)  | 6 (2 to 17.25) (36) | 0.08         |
| Visible haematuria prior to presentation (Yes/Evaluable patients (%))               | 149/188 (79.3)           | 15/142 (10.6)      | 5/58 (8.6)          | 0.68         |
| Time to renal biopsy from onset of visible haematuria (months, median (IQR) (n))    | 4 (2 to 63) (19)         | 5 (2 to 63) (15)   | 3 (0.5 to 68) (4)   | 0.57         |
| Renal dysfunction prior to presentation ((Yes/Evaluable patients (%))               | 149/188 (79.3)           | 113/132 (85.6)     | 36/56 (64.3)        | <b>0.001</b> |
| Time to renal biopsy from onset of renal dysfunction (months, median (IQR) (n))     | 3 (1 to 7) (184)         | 2 (1 to 7) (130)   | 3.5 (1 to 12) (54)  | 0.42         |
| Proteinuria prior to presentation (Yes/Evaluable patients (%))                      | 157/160 (98.1)           | 111/112 (99.1)     | 46/48 (95.8)        | 0.16         |
| Time to renal biopsy from onset of proteinuria (months, median (IQR) (n))           | 2 (1 to 8) (160)         | 2 (1 to 6) (112)   | 4 (1 to 12) (48)    | 0.16         |
| Nonvisible haematuria prior to presentation (Yes/Evaluable patients (%))            | 90/124 (72.6)            | 61/86 (70.9)       | 29/38 (76.3)        | 0.54         |
| Time to renal biopsy from onset of nonvisible haematuria (months, median (IQR) (n)) | 2 (1 to 7.75) (120)      | 1 (0 to 4.75) (84) | 4.5 (2 to 12) (36)  | 0.22         |
| Family history of CKD (Yes/Evaluable patients (%))                                  | 11/201 (5.5)             | 8/143 (5.6)        | 3/58 (5.2)          | 0.9          |
| On RASB prior to biopsy (Yes/Evaluable patients (%))                                | 74/201 (37)              | 52/143 (36.4)      | 22/58 (37.9)        | 0.86         |

**Table S3 Impact of gender on baseline laboratory parameters in the GRACE-IgANI cohort**

| <b>Baseline characteristic</b>                                               | <b>Entire Cohort<br/>(n=201)</b> | <b>Male<br/>(n=142)</b>   | <b>Female<br/>(n=59)</b> | <b>P value</b>   |
|------------------------------------------------------------------------------|----------------------------------|---------------------------|--------------------------|------------------|
| Haemoglobin (g/dL, mean±SD (Evaluable patients))                             | 12.12±2.06 (201)                 | 12.57±2.05                | 11.03±1.65               | <b>&lt;0.001</b> |
| Serum total protein (g/dL, mean±SD (Evaluable patients))                     | 6.85±0.7 (198)                   | 6.91±0.72 (140)           | 6.7±0.64 (58)            | 0.06             |
| Serum albumin (g/dL, mean±SD (Evaluable patients))                           | 4±0.56 (198)                     | 4.04±0.53 (140)           | 3.76±0.6 (58)            | <b>0.001</b>     |
| 24-hour urine protein (g/day, median (IQR) (Evaluable patients))             | 1.9 (1 to 3.75) (200)            | 1.95 (1 to 4) (142)       | 1.85 (0.78 to 3.2) (58)  | 0.11             |
| Serum total cholesterol (mg/dL, mean±SD (Evaluable patients))                | 176.88±57.12 (198)               | 174.01±56.07 (140)        | 183.81±59.495 (58)       | 0.27             |
| Serum uric acid (mg/dL, mean±SD (Evaluable patients))                        | 7.02±1.88 (199)                  | 7.28±1.88 (141)           | 6.4±1.74 (58)            | <b>0.003</b>     |
| Serum creatinine (mg/dL, mean±SD (Evaluable patients))                       | 2.1±1.06 (201)                   | 2.23±1.05 (142)           | 1.8±1.04 (59)            | <b>0.01</b>      |
| eGFR MDRD (ml/min/1.73m <sup>2</sup> , median (IQR) (Evaluable patients))    | 36 (24 to 60.5) (201)            | 36.5 (24.8 to 57.3) (201) | 36 (22 to 76) (201)      | 0.79             |
| eGFR CKD-EPI (ml/min/1.73m <sup>2</sup> , median (IQR) (Evaluable patients)) | 36 (26 to 67.5) (201)            | 39.5 (26.8 to 64) (201)   | 40 (23 to 88) (201)      | 0.19             |

**Table S4 Impact of gender on histopathological parameters in the GRACE-IgANI cohort**

| <b>MEST-C Score</b>                          | <b>Entire Cohort (n=185)</b> | <b>Male (n=134)</b>  | <b>Female (n=51)</b> | <b>P value</b> |
|----------------------------------------------|------------------------------|----------------------|----------------------|----------------|
| M1 / M0 (M1 %)                               | 21/164 (11.4)                | 16/118(11.9)         | 5/46 (9.8)           | 0.68           |
| E1 / E0 (E1 %)                               | 81/104 (43.8)                | 56/78 (41.8)         | 25/26 (49)           | 0.38           |
| S1 / S0 (S1 %)                               | 148/37 (80)                  | 107/27 (79.9)        | 41/10 (80.4)         | 0.93           |
| T2 / T1 / T0 (T2 % / T1%)                    | 76/70/39 (41.4 / 37.8)       | 54/57/23 (40.3/42.5) | 22/13/16 (43.1/25.5) | <b>0.04</b>    |
| C2 / C1 / C0 (C2 % / C1%)                    | 4/12/169 (2.2 / 6.4)         | 4/5/125 (3/3.7)      | 0/7/44 (0/13.7)      | <b>0.025</b>   |
| <b>Global glomerulosclerosis (GS)</b>        | <b>Entire Cohort (n=184)</b> | <b>Male (n=133)</b>  | <b>Female (n=51)</b> | <b>P value</b> |
| (GS/total glomeruli) *100 (% (median (IQR))) | 32.05 (12.5 to 46.66)        | 30 (14.8 to 46.3)    | 33.33 (12.5 to 50)   | 0.92           |
| <b>Immunofluorescence staining</b>           | <b>Entire Cohort (n=201)</b> | <b>Male (n=142)</b>  | <b>Female (n=59)</b> | <b>P value</b> |
| IgA (+++, n (%))                             | 148 (73.6)                   | 104 (73.2)           | 44 (74.6)            | 0.85           |
| IgG (++ & +++, n (%))                        | 11 (5.5)                     | 7 (4.9)              | 4 (6.8)              | 0.6            |
| IgM (++ & +++, n (%))                        | 4 (2)                        | 2 (1.4)              | 2 (3.4)              | 0.36           |
| C3 (++ & +++, n (%))                         | 74(36.8)                     | 52 (36.6)            | 22 (37.3)            | 0.93           |

Total number of glomeruli per biopsy (median (IQR))= 9 (7-13)

**Table S5 Baseline clinical characteristics of the GRACE-IgANI cohort stratified by Total Risk Score**

| Baseline characteristic                                                             | Entire Cohort (n=185) | Lower Risk (n=91)   | Higher Risk (n=94)  | P value          |
|-------------------------------------------------------------------------------------|-----------------------|---------------------|---------------------|------------------|
| Gender (male: female; ratio)                                                        | 134:51 (2.6:1)        | 67:24 (2.8:1)       | 67:27 (2.5:1)       | 0.72             |
| Age (years, mean±SD)                                                                | 36.1±10.2             | 35.1±10.6           | 37.1±9.8            | 0.19             |
| BMI (kg/m <sup>2</sup> , mean±SD)                                                   | 24.9±4.1              | 25±4.1              | 24.7±4              | 0.59             |
| Hypertension (Yes/Evaluable patients (%))                                           | 157/185 (84.9)        | 68/91 (74.7)        | 89/94 (94.7)        | <b>&lt;0.001</b> |
| Time to renal biopsy from onset of hypertension (months, median (IQR) (n))          | 11 (2 to 36) (156)    | 12 (2 to 48) (67)   | 8 (2 to 36) (89)    | 0.42             |
| Systolic blood pressure (Hg) (mean±SD)                                              | 138.4±19.9            | 132.5±18.3          | 144.2±19.7          | <b>&lt;0.001</b> |
| Diastolic blood pressure (mmHg) (mean±SD)                                           | 86.7±12.2             | 84.2±10.5           | 89.2±13.2           | <b>0.005</b>     |
| Mean arterial pressure (mmHg) (mean±SD)                                             | 103.94±13.9           | 100.3±12.5          | 107.5±14.3          | <b>&lt;0.001</b> |
| Blood pressure ≥ 140/90mmHg (Yes/Evaluable patients (%))                            | 101/185 (54.6%)       | 35/91 (38.4)        | 66/94 (70.2)        | <b>&lt;0.001</b> |
| Synpharyngitic presentation (Yes/Evaluable patients (%))                            | 7/184 (3.8)           | 7/90 (7.8)          | 0/94 (0)            | <b>0.006</b>     |
| Pedal edema at presentation ((Yes/Evaluable patients (%))                           | 84/184 (45.7)         | 31/90 (34.4)        | 53/94 (56.4)        | <b>0.003</b>     |
| Time to renal biopsy from onset of pedal edema (months, median (IQR) (n))           | 4 (2 to 12) (85)      | 4 (2 to 12) (31)    | 3 (1.8 to 9.8) (54) | 0.54             |
| Visible haematuria at presentation (Yes/Evaluable patients (%))                     | 18/184 (9.8)          | 11/90 (12.2)        | 7/94 (7.4)          | 0.28             |
| Time to renal biopsy from onset of visible haematuria (months, median (IQR) (n))    | 4 (1.5 to 49) (17)    | 3 (1 to 6) (10)     | 35 (3 to 183) (7)   | 0.07             |
| Renal dysfunction prior to biopsy ((Yes/Evaluable patients (%))                     | 138/174 (79.3)        | 54/84 (64.3)        | 84/90 (93.3)        | <b>&lt;0.001</b> |
| Time to renal biopsy from onset of renal dysfunction (months, median (IQR) (n))     | 2 (1 to 7.3) (170)    | 2 (1 to 10.25) (82) | 2 (1 to 6) (88)     | 0.77             |
| Proteinuria prior to biopsy (Yes/Evaluable patients (%))                            | 146/147 (99.3)        | 71/72 (98.6)        | 75/75 (100)         | 0.31             |
| Time to renal biopsy from onset of proteinuria (months, median (IQR) (n))           | 2 (1 to 8) (147)      | 3 (1 to 10.5) (73)  | 2 (1 to 6) (74)     | 0.85             |
| Nonvisible haematuria prior to biopsy (Yes/Evaluable patients (%))                  | 82/113 (72.6)         | 40/58 (69)          | 42/55 (76.4)        | 0.38             |
| Time to renal biopsy from onset of nonvisible haematuria (months, median (IQR) (n)) | 2 (1 to 8) (109)      | 3 (1 to 10) (58)    | 2 (1 to 6) (51)     | 0.46             |
| Family history of CKD (Yes/Evaluable patients (%))                                  | 11/184 (6)            | 5/90 (5.6)          | 6/94 (6.4)          | 0.81             |
| On RASB prior to biopsy (Yes/Evaluable patients (%))                                | 67/184 (36.4)         | 39/90 (43.3)        | 28/94 (29.8)        | 0.056            |

**Table S6 Baseline laboratory parameters of the GRACE-IgANI cohort stratified by Total Risk Score**

| <b>Baseline characteristic</b>                                               | <b>Entire Cohort<br/>(n=185)</b> | <b>Lower Risk<br/>(n=91)</b> | <b>Higher Risk<br/>(n=94)</b> | <b>P value</b>   |
|------------------------------------------------------------------------------|----------------------------------|------------------------------|-------------------------------|------------------|
| Haemoglobin (g/dL, mean±SD (evaluable patients))                             | 12.2±2.1 (185)                   | 12.9±1.9 (91)                | 11.4±1.9 (94)                 | <b>&lt;0.001</b> |
| Serum total protein (g/dL, mean±SD (evaluable patients))                     | 6.85±0.7 (182)                   | 7.09±0.71 (90)               | 6.61±0.63 (92)                | <b>&lt;0.001</b> |
| Serum albumin (g/dL, mean±SD (evaluable patients))                           | 4±0.6 (182)                      | 4.12±0.62 (90)               | 3.8±0.46 (92)                 | <b>&lt;0.001</b> |
| 24-hour urine protein (g/day, median (IQR) (evaluable patients))             | 1.9 (1 to 3.8) (184)             | 1.1 (0.7 to 1.9) (90)        | 3.6 (1.8 to 5.1) (94)         | <b>&lt;0.001</b> |
| Serum total cholesterol (mg/dL, mean±SD (evaluable patients))                | 176.3±58 (182)                   | 175.69±63.3 (89)             | 176.96±52.7 (93)              | 0.88             |
| Serum uric acid (mg/dL, mean±SD (evaluable patients))                        | 7±1.9 (183)                      | 6.74±1.85 (90)               | 7.28±1.91 (93)                | 0.052            |
| Serum creatinine (mg/dL, mean±SD (evaluable patients))                       | 2.1±1.0 (185)                    | 1.47±0.6 (91)                | 2.69±1 (94)                   | <b>&lt;0.001</b> |
| eGFR MDRD (ml/min/1.73m <sup>2</sup> , median (IQR) (evaluable patients))    | 37 (24.5 to 61) (185)            | 55 (38 to 87) (91)           | 25 (19 to 36.3) (94)          | <b>&lt;0.001</b> |
| eGFR CKD-EPI (ml/min/1.73m <sup>2</sup> , median (IQR) (evaluable patients)) | 40 (26.5 to 68.5) (185)          | 61 (41 to 102) (91)          | 27 (20 to 40) (94)            | <b>&lt;0.001</b> |

**Table S7 Histopathological parameters in the GRACE-IgANI cohort stratified by Total Risk Score**

| <b>MEST-C Score</b>                          | <b>Entire Cohort<br/>(n=185)</b> | <b>Lower Risk<br/>(n=91)</b> | <b>Higher Risk<br/>(n=94)</b> | <b>P value</b>   |
|----------------------------------------------|----------------------------------|------------------------------|-------------------------------|------------------|
| M1 / M0 (M1 %)                               | 21/164 (11.4)                    | 10/81 (11)                   | 11/83 (11.7)                  | 0.88             |
| E1 / E0 (E1 %)                               | 81/104 (43.8)                    | 33/58 (36.3)                 | 48/46 (51.1)                  | <b>0.043</b>     |
| S1 / S0 (S1 %)                               | 148/37 (80)                      | 58/33 (63.7)                 | 90/94 (95.7)                  | <b>&lt;0.001</b> |
| T2 / T1 / T0 (T2 % / T1%)                    | 76/70/39 (41.4 / 37.8)           | 3/49/39 (3.3/53.8)           | 73/21/0 (77.7/22.3)           | <b>&lt;0.001</b> |
| C2 / C1 / C0 (C2 % / C1%)                    | 4/12/169 (2.2 / 6.5)             | 2/7/82 (2.2/7.7)             | 2/5/87 (2.1/5.3)              | 0.81             |
| <b>Global glomerulosclerosis (GS)</b>        | <b>Entire Cohort<br/>(n=184)</b> | <b>Lower Risk<br/>(n=91)</b> | <b>Higher Risk<br/>(n=94)</b> | <b>P value</b>   |
| (GS/total glomeruli) *100 (% (median (IQR))) | 32.1 (12.5 to 46.7)              | 16.7 (0 to 33.3)             | 41.7 (27.8 to 57.1)           | <b>&lt;0.001</b> |
| <b>Immunofluorescence staining</b>           | <b>Entire Cohort<br/>(n=201)</b> | <b>Lower Risk<br/>(n=91)</b> | <b>Higher Risk<br/>(n=94)</b> | <b>P value</b>   |
| IgA (+++, n (%))                             | 148 (73.6)                       | 75 (82.4)                    | 63 (67)                       | <b>0.016</b>     |
| IgG (++ & +++, n (%))                        | 11 (5.5)                         | 6 (6.6)                      | 4 (4.3)                       | 0.48             |
| IgM (++ & +++, n (%))                        | 4 (2)                            | 4 (4.4)                      | 0 (0)                         | <b>0.04</b>      |
| C3 (++ & +++, n (%))                         | 74 (36.8)                        | 32 (35.2)                    | 37 (39.4)                     | 0.56             |

Total number of glomeruli per biopsy (median (IQR))= 9 (7-13); LR 10 (7-14) and HR 9 (6-13)

**Table S8 Baseline clinical characteristics of the GRACE-IgANI cohort stratified by the five-year risk of progression to the combined endpoint of 50% decline in eGFR or ESKD using the IIGANN risk calculator**

| Baseline characteristic                                                             | Entire Cohort (n=185) | IIGANN risk <35% (n=90) | IIGANN risk ≥35% (n=95) | P value          |
|-------------------------------------------------------------------------------------|-----------------------|-------------------------|-------------------------|------------------|
| Gender (male: female; ratio)                                                        | 134:51 (2.6:1)        | 64:26 (2.5:1)           | 70:25 (3:1)             | 0.7              |
| Age (years, mean±SD)                                                                | 36.1±10.2             | 35.5±10.8               | 36.7±9.6                | 0.44             |
| BMI (kg/m <sup>2</sup> , mean±SD)                                                   | 24.9±4.1              | 25.3±4.3                | 24.5±3.8                | 0.18             |
| Hypertension (Yes/Evaluable patients (%))                                           | 157/185 (84.9)        | 68/91 (74.7)            | 89/94 (94.7)            | <b>&lt;0.001</b> |
| Time to renal biopsy from onset of hypertension (months, median (IQR) (n))          | 11 (2 to 36) (156)    | 12 (2 to 48.5) (66)     | 9 (2 to 36) (90)        | 0.7              |
| Systolic blood pressure (Hg) (mean±SD)                                              | 138.4±19.9            | 133.4±18.1              | 143.2±20.4              | <b>0.001</b>     |
| Diastolic blood pressure (mmHg) (mean±SD)                                           | 86.7±12.2             | 84.4±10.5               | 88.9±13.3               | <b>0.01</b>      |
| Mean arterial pressure (mmHg) (mean±SD)                                             | 103.94±13.9           | 100.7±12.2              | 107±14.7                | <b>0.002</b>     |
| Blood pressure ≥ 140/90mmHg (Yes/Evaluable patients (%))                            | 101/185 (54.6%)       | 38/89 (42.7)            | 63/95 (66.3)            | <b>0.001</b>     |
| Synpharyngitic presentation (Yes/Evaluable patients (%))                            | 7/184 (3.8)           | 7/89 (7.9)              | 0/95 (0)                | <b>0.005</b>     |
| Pedal edema at presentation ((Yes/Evaluable patients (%))                           | 84/184 (45.7)         | 33/89 (37.1)            | 51/95 (53.7)            | <b>0.024</b>     |
| Time to renal biopsy from onset of pedal edema (months, median (IQR) (n))           | 4 (2 to 12) (85)      | 4 (2 to 12) (33)        | 4 (2 to 9) (52)         | 0.83             |
| Visible haematuria at presentation (Yes/Evaluable patients (%))                     | 18/184 (9.8)          | 11/89 (12.4)            | 7/95 (7.4)              | 0.26             |
| Time to renal biopsy from onset of visible haematuria (months, median (IQR) (n))    | 4 (1.5 to 49) (17)    | 3 (1 to 6) (10)         | 35 (3 to 183) (7)       | 0.07             |
| Renal dysfunction prior to biopsy ((Yes/Evaluable patients (%))                     | 138/174 (79.3)        | 49/83(59)               | 89/91 (97.8)            | <b>&lt;0.001</b> |
| Time to renal biopsy from onset of renal dysfunction (months, median (IQR) (n))     | 2 (1 to 7.3) (170)    | 2 (1 to 10.75) (80)     | 2 (1 to 6) (90)         | 0.62             |
| Proteinuria prior to biopsy (Yes/Evaluable patients (%))                            | 146/147 (99.3)        | 71/72 (98.6)            | 75/75 (100)             | 0.31             |
| Time to renal biopsy from onset of proteinuria (months, median (IQR) (n))           | 2 (1 to 8) (147)      | 3 (1 to 11.5) (73)      | 2 (1 to 5.25) (74)      | 0.22             |
| Nonvisible haematuria prior to biopsy (Yes/Evaluable patients (%))                  | 82/113 (72.6)         | 42/56 (75)              | 40/57 (70.2)            | 0.57             |
| Time to renal biopsy from onset of nonvisible haematuria (months, median (IQR) (n)) | 2 (1 to 8) (109)      | 3 (1 to 10) (55)        | 2 (1 to 4) (54)         | 0.12             |
| Family history of CKD (Yes/Evaluable patients (%))                                  | 11/184 (6)            | 6/89 (6.7)              | 5/95 (5.3)              | 0.67             |
| On RASB prior to biopsy (Yes/Evaluable patients (%))                                | 67/184 (36.4)         | 38/89 (42.7)            | 29/95 (30.5)            | 0.09             |



**Table S9 Baseline laboratory parameters of the GRACE-IgANI cohort stratified by the five-year risk of progression to the combined endpoint of 50% decline in eGFR or ESKD using the IIGANN risk calculator**

| Baseline characteristic                                                      | Entire Cohort<br>(n=185) | IIGANN risk <35%<br>(n=90) | IIGANN risk ≥35%<br>(n=95) | P value |
|------------------------------------------------------------------------------|--------------------------|----------------------------|----------------------------|---------|
| Haemoglobin (g/dL, mean±SD (evaluable patients))                             | 12.2±2.1 (185)           | 12.9±2 (90)                | 11.4±1.8 (95)              | <0.001  |
| Serum total protein (g/dL, mean±SD (evaluable patients))                     | 6.85±0.7 (182)           | 7.06±0.8 (89)              | 6.66±0.6 (93)              | <0.001  |
| Serum albumin (g/dL, mean±SD (evaluable patients))                           | 4±0.6 (182)              | 4.07±0.6 (89)              | 3.84±0.5 (93)              | 0.007   |
| 24-hour urine protein (g/day, median (IQR) (evaluable patients))             | 1.9 (1 to 3.8) (184)     | 1.1 (0.7 to 2.2) (89)      | 3.1 (1.7 to 4.9) (95)      | <0.001  |
| Serum total cholesterol (mg/dL, mean±SD (evaluable patients))                | 176.3±58 (182)           | 173.8±64.8 (88)            | 178.7±51 (94)              | 0.58    |
| Serum uric acid (mg/dL, mean±SD (evaluable patients))                        | 7±1.9 (183)              | 6.7±1.9 (89)               | 7.3±1.9 (94)               | 0.031   |
| Serum creatinine (mg/dL, mean±SD (evaluable patients))                       | 2.1±1.0 (185)            | 1.34±0.5 (89)              | 2.8±0.9 (95)               | <0.001  |
| eGFR MDRD (ml/min/1.73m <sup>2</sup> , median (IQR) (evaluable patients))    | 37 (24.5 to 61) (185)    | 61 (44 to 89.5) (90)       | 25 (19 to 33) (95)         | <0.001  |
| eGFR CKD-EPI (ml/min/1.73m <sup>2</sup> , median (IQR) (evaluable patients)) | 40 (26.5 to 68.5) (185)  | 68.5 (48 to 102.3) (90)    | 27 (20 to 37) (95)         | <0.001  |

**Table S10 Histopathological parameters in the GRACE-IgANI cohort stratified by the five-year risk of progression to the combined endpoint of 50% decline in eGFR or ESKD using the IIGANN risk calculator**

| <b>MEST-C Score</b>                          | <b>Entire Cohort<br/>(n=185)</b> | <b>IIGANN risk &lt;35%<br/>(n=90)</b> | <b>IIGANN risk ≥35%<br/>(n=95)</b> | <b>P value</b>   |
|----------------------------------------------|----------------------------------|---------------------------------------|------------------------------------|------------------|
| M1 / M0 (M1 %)                               | 21/164 (11.4)                    | 9/81 (10)                             | 12/83 (12.6)                       | 0.57             |
| E1 / E0 (E1 %)                               | 81/104 (43.8)                    | 36/54 (40)                            | 45/50 (47.4)                       | 0.31             |
| S1 / S0 (S1 %)                               | 148/37 (80)                      | 59/31 (65.6)                          | 89/95 (93.7)                       | <b>&lt;0.001</b> |
| T2 / T1 / T0 (T2 % / T1%)                    | 76/70/39 (41.4 / 37.8)           | 10/42/38 (11.1/46.7)                  | 66/28/1 (69.5/28/1)                | <b>&lt;0.001</b> |
| C2 / C1 / C0 (C2 % / C1%)                    | 4/12/169 (2.2 / 6.5)             | 2/7/81 (2.2/7.8)                      | 2/5/88 (2.1/5.3)                   | 0.78             |
| <b>Global glomerulosclerosis (GS)</b>        | <b>Entire Cohort<br/>(n=184)</b> | <b>IIGANN risk &lt;35%<br/>(n=90)</b> | <b>IIGANN risk ≥35%<br/>(n=95)</b> | <b>P value</b>   |
| (GS/total glomeruli) *100 (% (median (IQR))) | 32.1 (12.5 to 46.7)              | 16 (0 to 28.9)                        | 42.9 (33.3 to 60)                  | <b>&lt;0.001</b> |
| <b>Immunofluorescence staining</b>           | <b>Entire Cohort<br/>(n=185)</b> | <b>IIGANN risk &lt;35%<br/>(n=90)</b> | <b>IIGANN risk ≥35%<br/>(n=95)</b> | <b>P value</b>   |
| IgA (+++, n (%))                             | 148 (73.6)                       | 72 (80)                               | 66 (69.5)                          | 0.1              |
| IgG (++ & +++, n (%))                        | 11 (5.5)                         | 6 (6.7)                               | 4 (4.2)                            | 0.46             |
| IgM (++ & +++, n (%))                        | 4 (2)                            | 4 (4.4)                               | 0 (0)                              | <b>0.038</b>     |
| C3 (++ & +++, n (%))                         | 74 (36.8)                        | 35 (38.9)                             | 34 (35.8)                          | 0.66             |

Total number of glomeruli per biopsy (median (IQR))= 9 (7-13); IIGANN risk <35%= 11 (8-14) and IIGANN risk ≥35%= 8 (6-12)
